# Supplementary material
Source: PubMed Central journal article supplement (PMC5879711)
Supplement: pnas.201800529SI.pdf [file pnas.201800529SI.pdf]

# Supporting Information

Nobori et al. 10.1073/pnas.1800529115

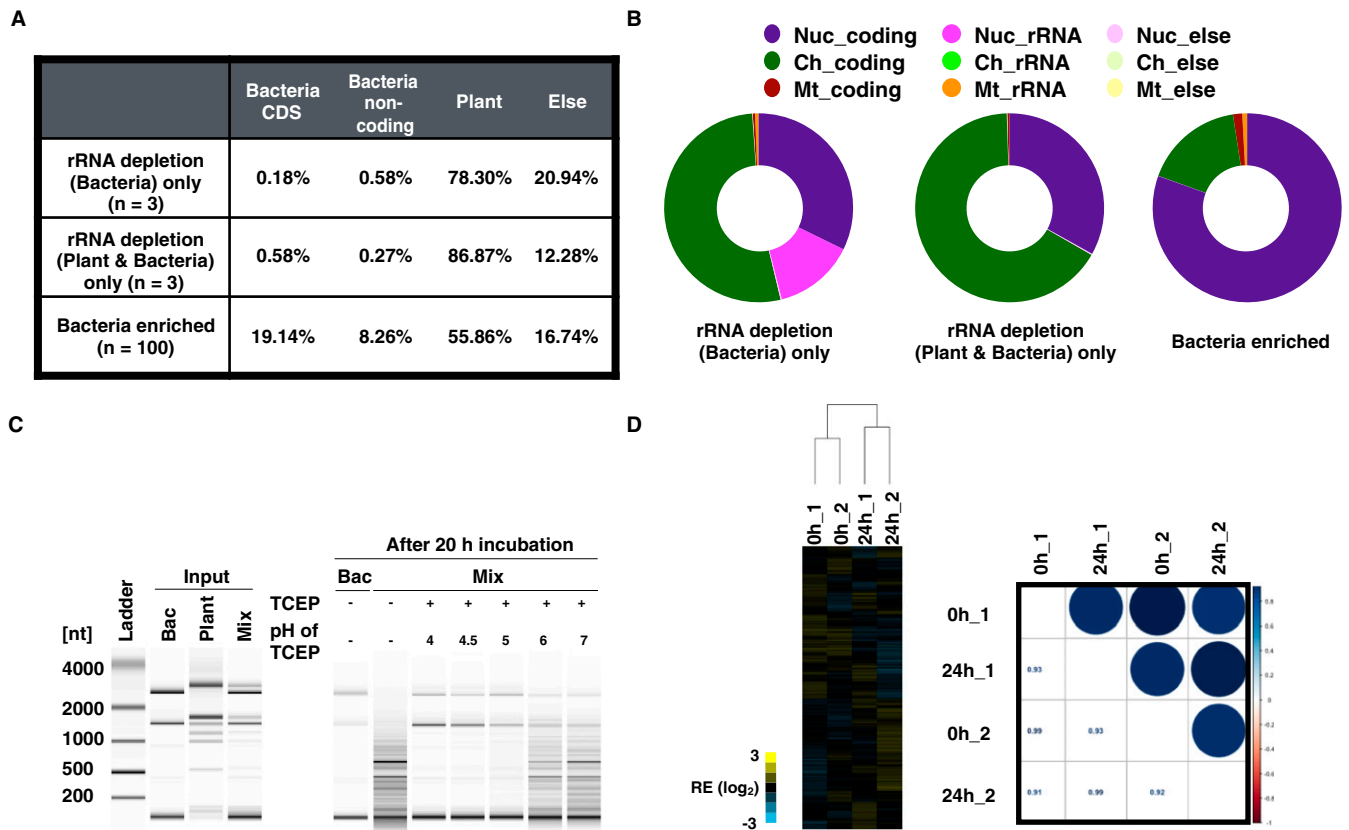

**Fig. S1.** Bacterial enrichment and quality of RNA extraction in the *in planta* bacterial transcriptome. (A) Proportion of the sequencing reads mapped on the *Pto* (Bacteria) CDS, the *Pto* noncoding sequence, the *A. thaliana* (Plant) genome, and on neither the *Pto* nor the *A. thaliana* genome (Else). (B) Proportion of the RNA-seq reads mapped on the *A. thaliana* genome. (Left and Middle) RNA extracted from the infected leaves, followed by bacterial rRNA depletion only (Left) and by bacterial and plant rRNA depletion (Middle) ( $n = 3$ ). (Right) RNA extracted from the bacteria-enriched samples, followed by bacterial and plant rRNA depletion (Bacteria enriched;  $n = 8$ ; a subset of all 100 *in planta* samples was randomly selected). Protein coding RNA (coding), ribosomal RNA (rRNA), and other RNA (else) encoded in the nucleus (Nuc), chloroplast (Ch), and mitochondrion (Mt) is shown. (C, Left) Assessment of RNA integrity with the 2100 Bioanalyzer (Agilent). Total RNA from *Pto* (Bac.), *A. thaliana* leaves (Plant), and the mixture of both (Mix) was analyzed. (Right) Bacterial cells were incubated with crushed *A. thaliana* leaves in RNA-stabilizing buffer (9.5% ethanol and 0.5% phenol) without or with TCEP at different pHs for 20 h at 4 °C. Then total RNA was extracted and analyzed. (D) Bacterial isolation buffer fixes the bacterial transcriptome. *Pto* ( $OD_{600} = 0.65$ ) was incubated in bacterial isolation buffer for 0 h or 24 h, followed by RNA extraction and RNA-seq. Hierarchical clustering (Left) and Pearson correlation (Right) plots of all genes detected are shown ( $n = 2$  biological replicates from two independent experiments). RE, relative expression.



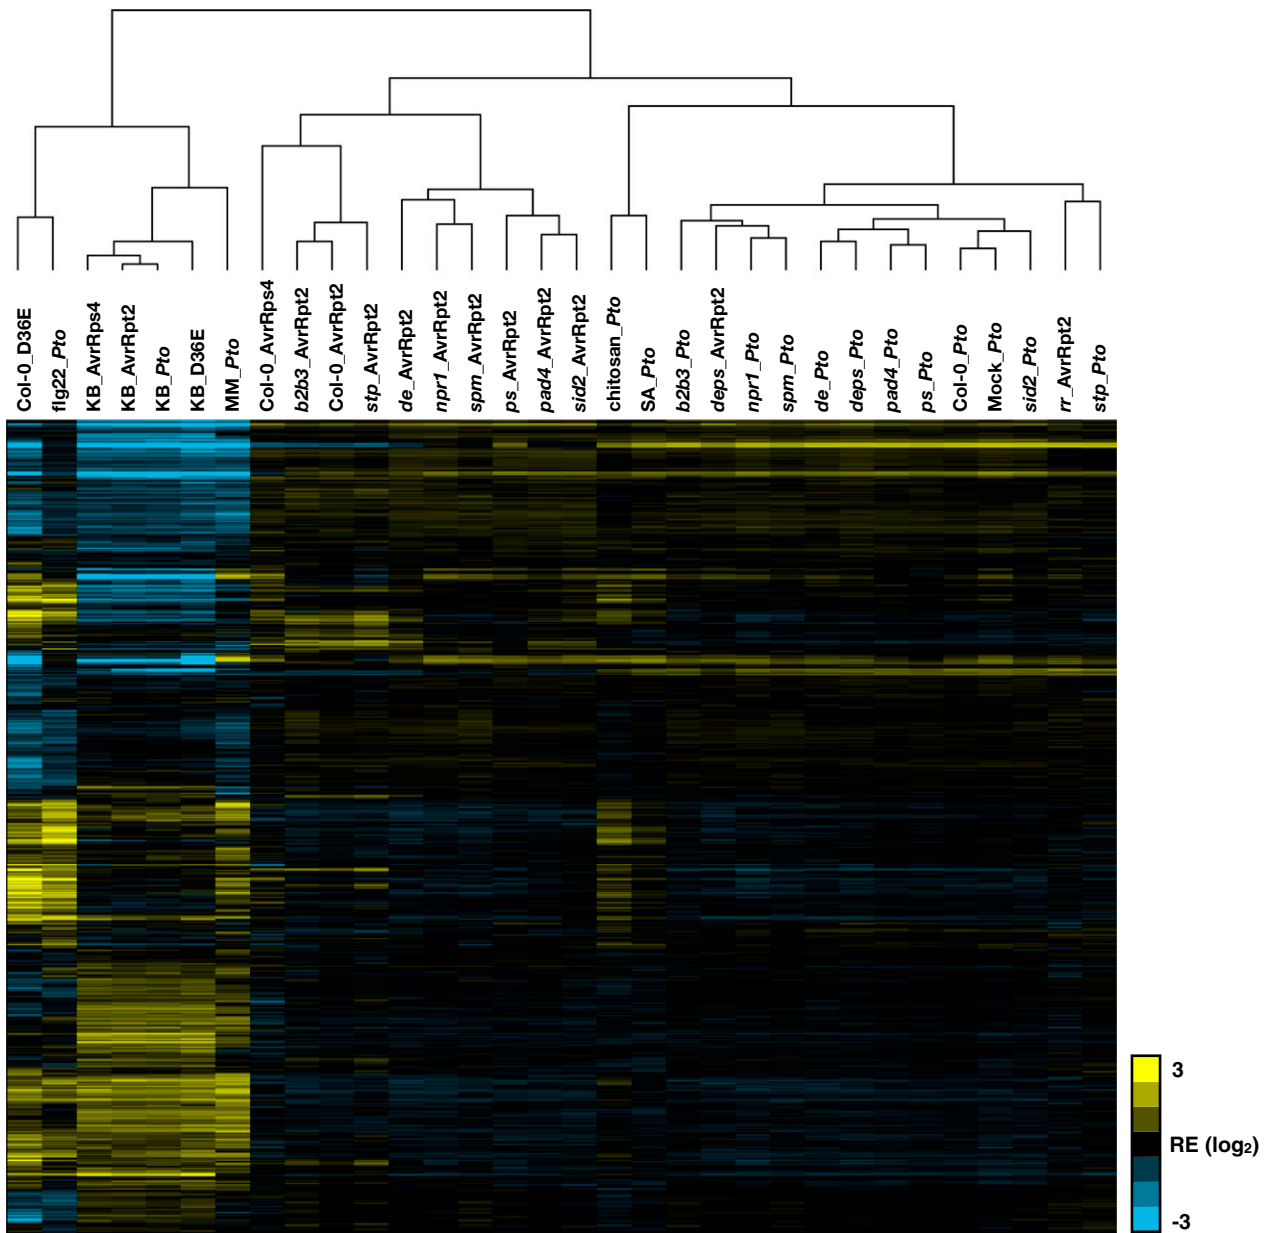

**Fig. S3.** Heatmap of the relative expression (RE) of *Pto* transcriptomes in all samples analyzed in this study. Hierarchical clustering was performed for both the genes (rows) and the samples (columns). The sample name consists of the name of the bacterial strain preceded by the name of host genotype, pretreatments to Col-0, or in vitro conditions (see Fig. 2A for the acronyms and [Dataset S6](#) for the mean expression values).

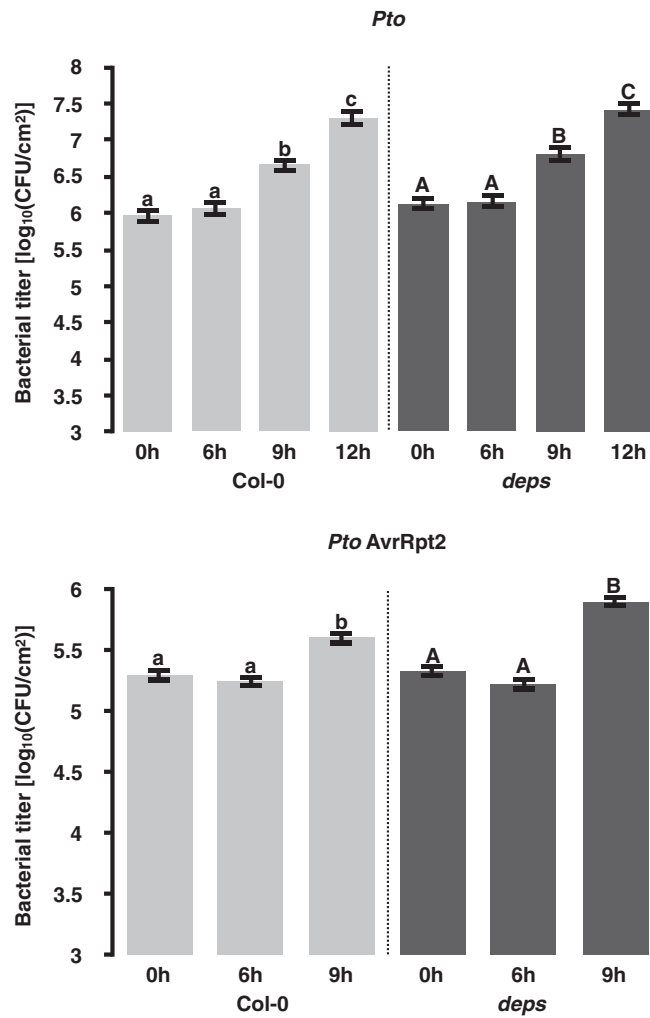

**Fig. 54.** *Pto* populations did not change at 6 hpi. Growth assay of *Pto* (Upper) or *Pto* AvrRpt2 (Lower) in Col-0 and *dde2 ein2 pad4 sid2* (*deps*) plants at the indicated time points. The bacterial suspension ( $OD_{600} = 0.5$ ) was syringe infiltrated into leaves. Means  $\pm$  SEM were calculated using the mixed linear model ( $n = 24$  biological replicates from two independent experiments). Different letters indicate statistically significant differences in each genotype (adjusted  $P < 0.001$ ; Benjamini–Hochberg method).
